# Supplementary material for: The pain interactome: Connecting pain-specific protein interactions
Source: PubMed Central journal article supplement — Pain. 2014 Nov;155(11):2243–52. doi: 10.1016/j.pain.2014.06.020 (PMC4247380; doi:10.1016/j.pain.2014.06.020), 2014-11
Supplement: mmc2.pdf [file mmc2.pdf]

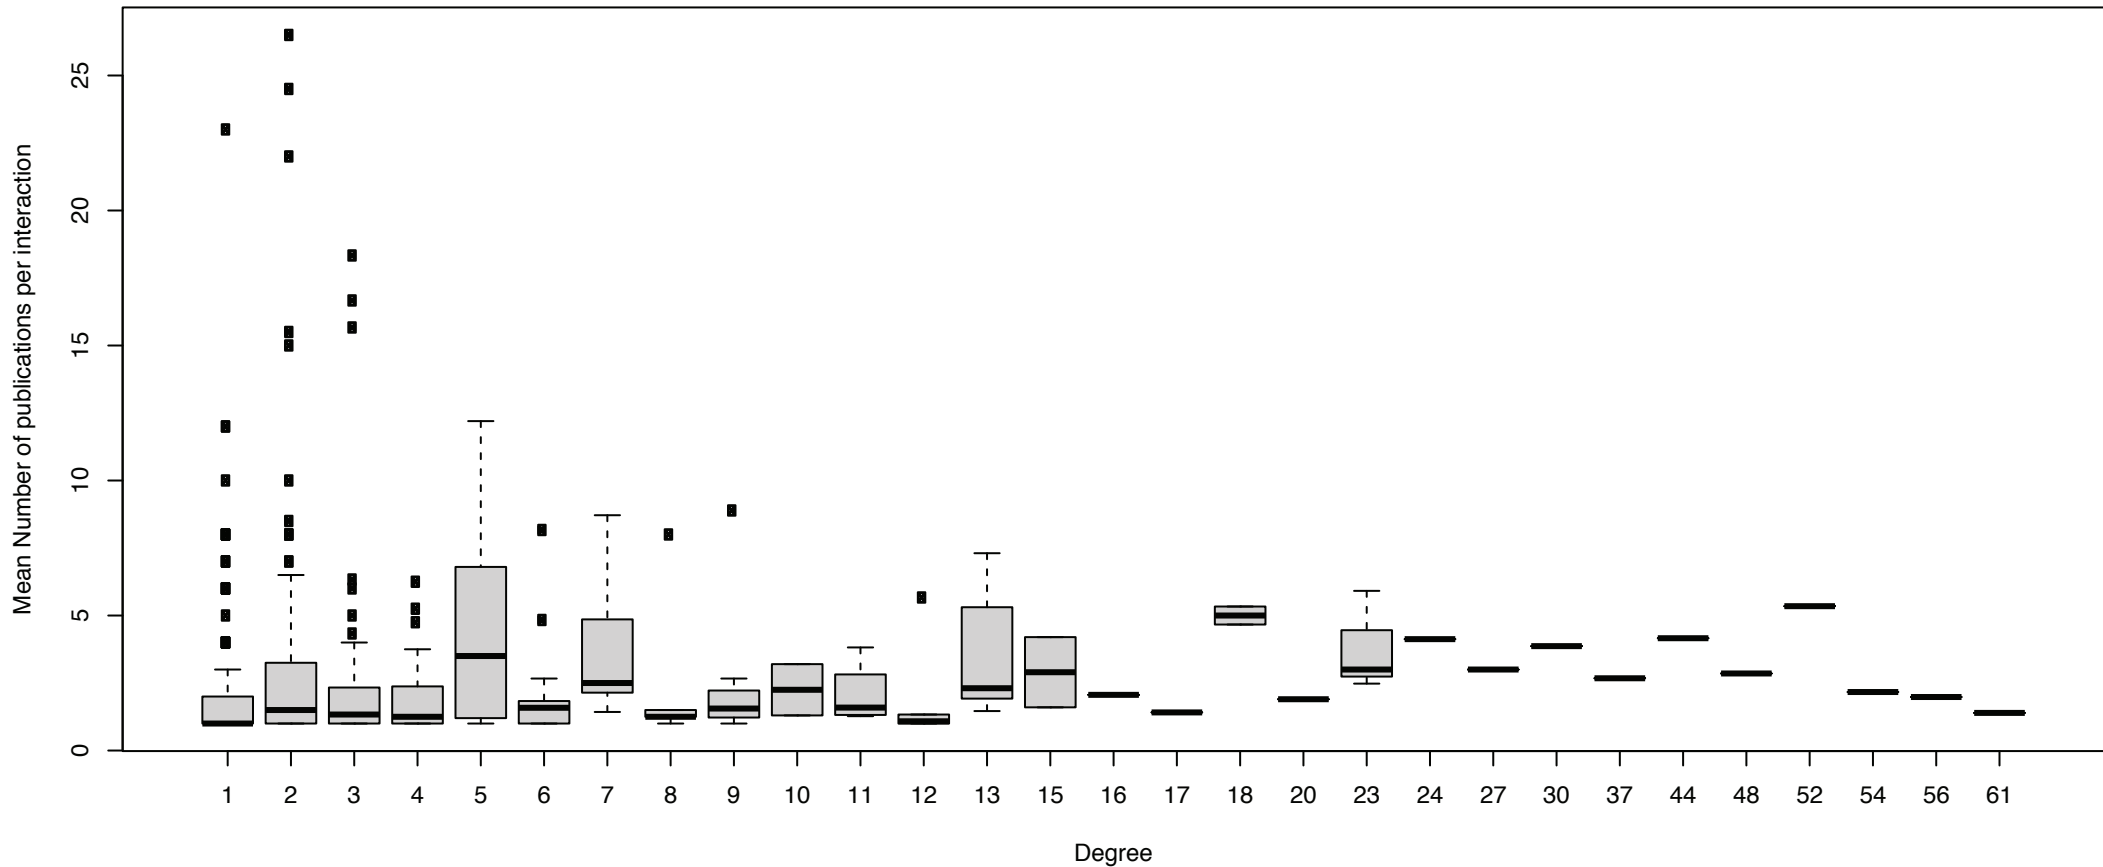

### Supplementary figure 2 | Boxplot of mean number of publications per interaction

Despite a positive correlation between degree and the number of publications on a protein in our data, there is no correlation between the degree and the mean number of papers per interaction, as shown here as a boxplot which more explicitly reveals the pattern in the data compared to the scatterplot in supplementary Fig. 1.
