# Supplementary material for: The pain interactome: Connecting pain-specific protein interactions
Source: PubMed Central journal article supplement — Pain. 2014 Nov;155(11):2243–52. doi: 10.1016/j.pain.2014.06.020 (PMC4247380; doi:10.1016/j.pain.2014.06.020), 2014-11
Supplement: mmc3.pdf [file mmc3.pdf]

**a**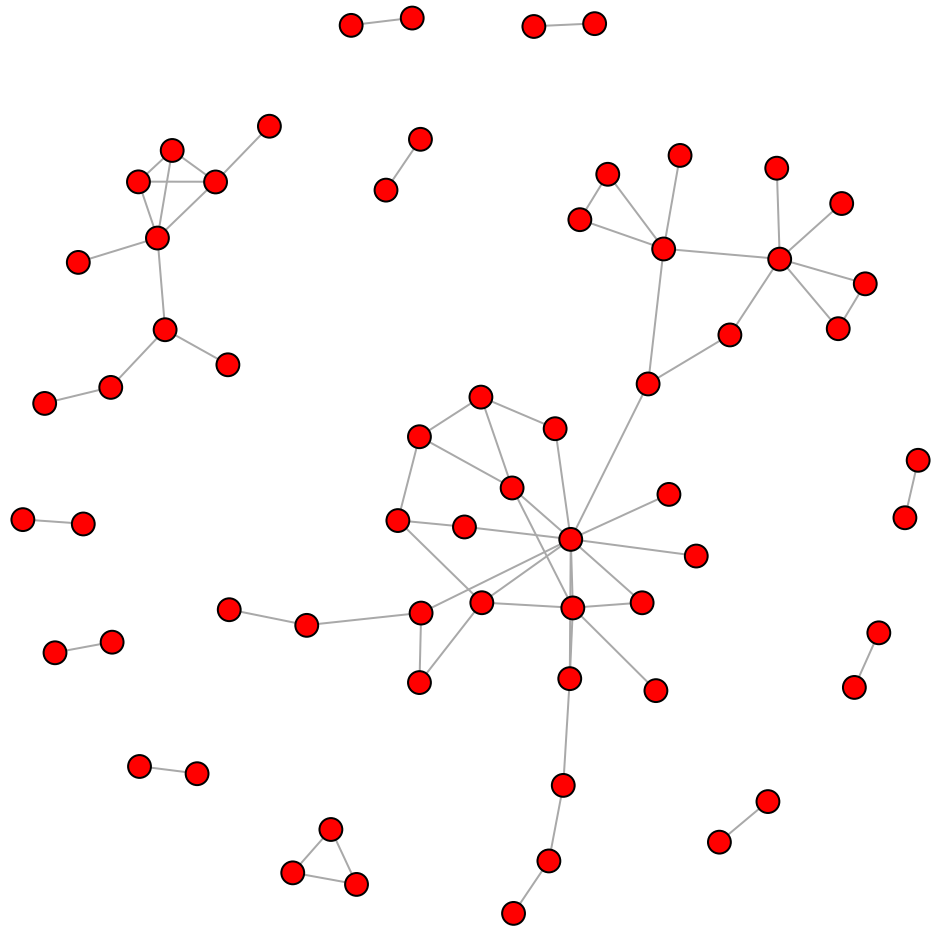**b**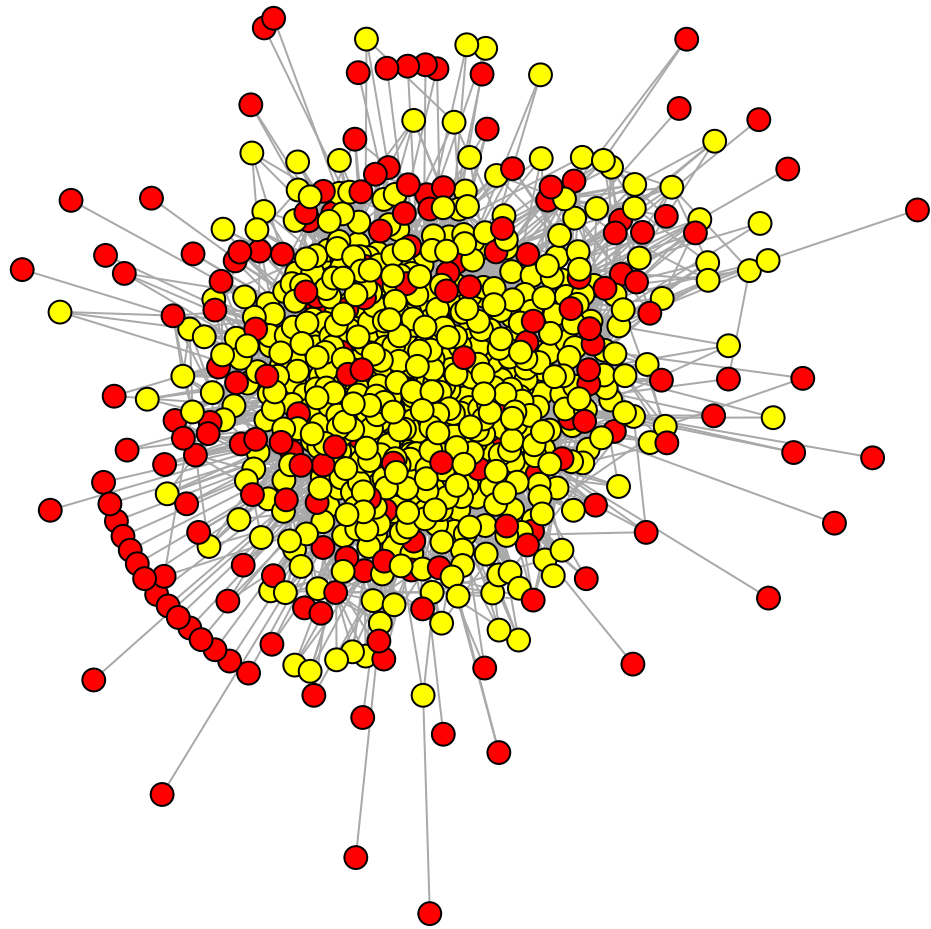**Supplementary Figure 3 | Pain PPI networks derived from expression data**

**a** represents a network of PPIs with interactions sourced from iRefIndex between proteins found differentially regulated across DRG and spinal cord tissue in the gene expression data. **b** includes these and interactions for first order neighbors with high-betweenness, stipulating that they have interactions with at least two of the input genes, so acting as bridges to connect the network.
