# Supplementary material for: The pain interactome: Connecting pain-specific protein interactions
Source: PubMed Central journal article supplement — Pain. 2014 Nov;155(11):2243–52. doi: 10.1016/j.pain.2014.06.020 (PMC4247380; doi:10.1016/j.pain.2014.06.020), 2014-11
Supplement: mmc4.pdf [file mmc4.pdf]

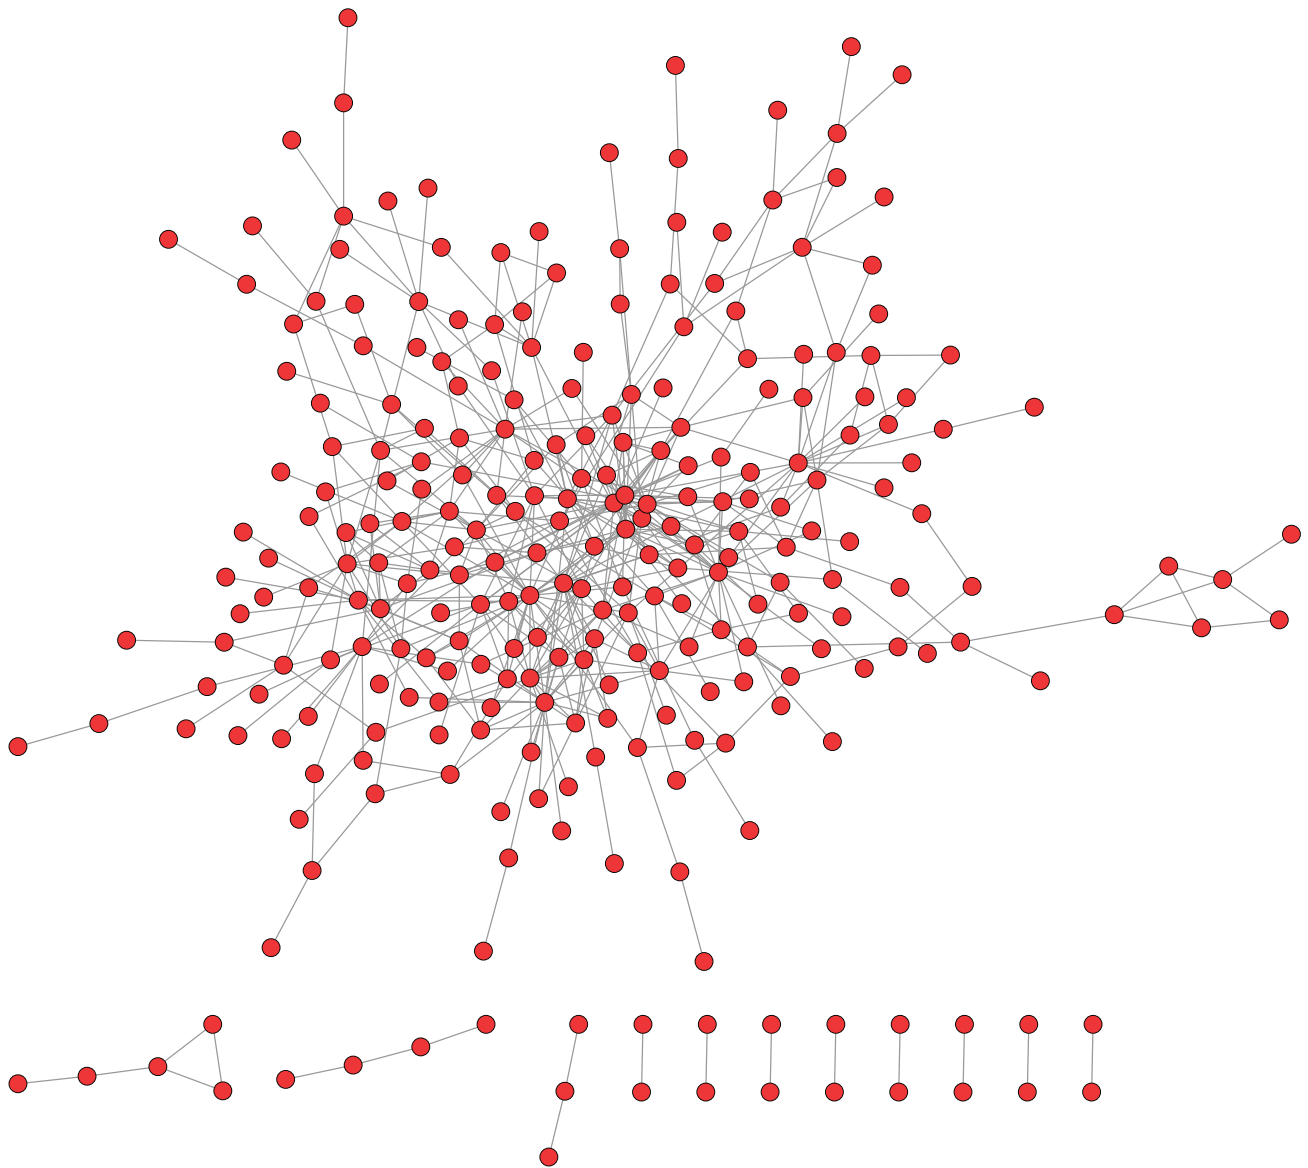

**Supplementary figure 4 | Pain Genes DB PPI network**

The PPI network for proteins present in Pain Genes DB connected by interactions sourced from iRefIndex.
