# Supplementary material for: The pain interactome: Connecting pain-specific protein interactions
Source: PubMed Central journal article supplement — Pain. 2014 Nov;155(11):2243–52. doi: 10.1016/j.pain.2014.06.020 (PMC4247380; doi:10.1016/j.pain.2014.06.020), 2014-11
Supplement: mmc8.pdf [file mmc8.pdf]

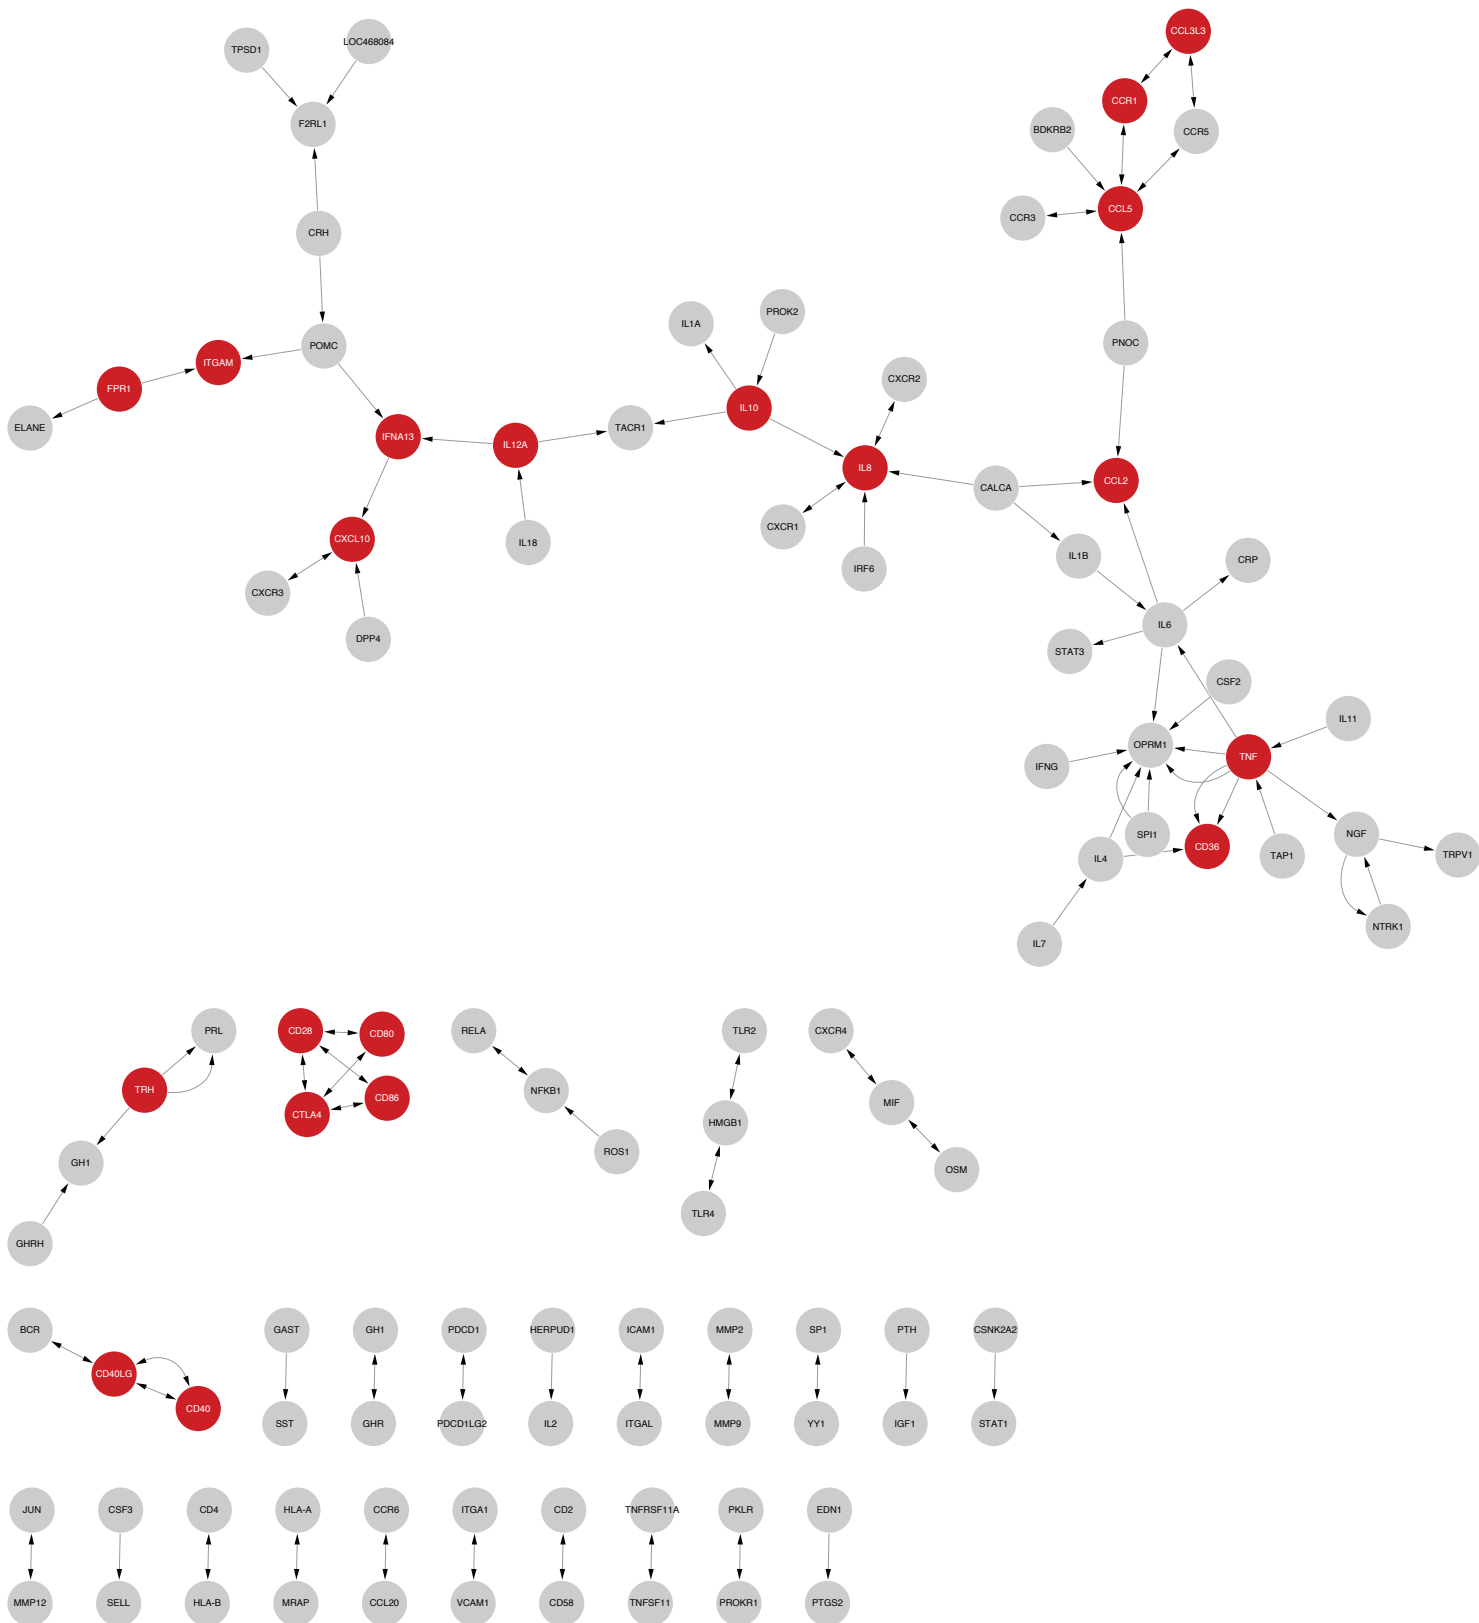

### Supplementary figure 8 | Immune system associated PPIs

PPIs were sourced from the main pain PPI graph and the anatomy context on wiki-pain.org was used to filter interactions that had an anatomical association with the immune system. Enriched nodes against the main pain PPI graph are coloured in dark red.
